# Supplementary material
Source: ML conference proceedings conference paper supplement (https://proceedings.neurips.cc/paper_files/paper/2012/hash/b51a15f382ac914391a58850ab343b00-Abstract.html)
Supplement: Supplementary file [file b51a15f382ac914391a58850ab343b00-Supplemental.zip]

---

# Probabilistic Low-Rank Subspace Clustering

## Supplementary Material

---

**S. Derin Babacan**  
 University of Illinois at Urbana-Champaign  
 Urbana, IL 61801, USA  
 dbabacan@gmail.com

**Shinichi Nakajima**  
 Nikon Corporation  
 Tokyo, 140-8601, Japan  
 nakajima.s@nikon.co.jp

**Minh N. Do**  
 University of Illinois at Urbana-Champaign  
 Urbana, IL 61801, USA  
 minhdo@illinois.edu

In this supplementary material, we provide the derivation of the global solution of the expectation-maximization method in Sec. 2.2 and the required statistics in the variational Bayesian methods in Secs. 3 and 4. Equation numbers are denoted with preceding “S-”, and the ones without “S-” refer to the main text.

### 1 Global Solution of the EM method

The log-likelihood is given by

$$\begin{aligned} \mathcal{L} &= \sum_{i=1}^N \log p(\mathbf{d}_i, \mathbf{y}_i | \mathbf{D}, \mathbf{A}) \\ &= -\frac{N}{2} \left( M \log(\sigma_y^2) + \log |\mathbf{K}| - \frac{1}{N} \text{tr}(\mathbf{K}^{-1} \mathbf{D} \mathbf{D}^T) \right) - \frac{1}{2\sigma_y^2} \text{tr}((\mathbf{Y} - \mathbf{D})^T (\mathbf{Y} - \mathbf{D})) + \text{const}, \end{aligned} \quad (\text{S-1})$$

with  $\mathbf{K} = \sigma_d^2 \mathbf{I} + \mathbf{D} \mathbf{A} \mathbf{A}^T \mathbf{D}^T$ . To maximize the log-likelihood w.r.t.  $\mathbf{A}$ , we take its gradient w.r.t.  $\mathbf{A}$  using matrix differentiation identities [2] and set it equal to zero, which yields

$$\mathbf{D}^T \mathbf{K}^{-1} \mathbf{D} \mathbf{A} = \frac{1}{N} \mathbf{D}^T \mathbf{K}^{-1} \mathbf{D} \mathbf{D}^T \mathbf{K}^{-1} \mathbf{D} \mathbf{A}. \quad (\text{S-2})$$

This has three possible solutions: (i)  $\mathbf{D} \mathbf{A} = \mathbf{0}$ , (ii)  $\mathbf{K} = \frac{1}{N} \mathbf{D} \mathbf{D}^T$ , and (iii)  $\mathbf{D} \mathbf{A} \neq \mathbf{0}$  and  $\mathbf{K} \neq \frac{1}{N} \mathbf{D} \mathbf{D}^T$ . We consider the latter two cases, as the first one is not interesting for subspace clustering. In the last case, assuming  $\sigma_d^2 > 0$  and thus  $\mathbf{K}^{-1}$  exists, we have

$$\mathbf{D} \mathbf{A} = \frac{1}{N} \mathbf{D} \mathbf{D}^T \mathbf{K}^{-1} \mathbf{D} \mathbf{A}. \quad (\text{S-3})$$

We first solve this system w.r.t.  $\mathbf{D} \mathbf{A}$ . Let the SVDs of  $\mathbf{D}$  and  $\mathbf{D} \mathbf{A}$  be<sup>1</sup>  $\mathbf{D} = \mathbf{U} \mathbf{\Lambda} \mathbf{V}^T$  and  $\mathbf{D} \mathbf{A} = \hat{\mathbf{U}} \hat{\mathbf{\Lambda}} \hat{\mathbf{V}}^T$ , respectively, such that we have

$$\mathbf{K}^{-1} \mathbf{D} \mathbf{A} = (\sigma_d^2 \mathbf{I} + \mathbf{D} \mathbf{A} \mathbf{A}^T \mathbf{D}^T)^{-1} \mathbf{D} \mathbf{A}, \quad (\text{S-4})$$

$$= \mathbf{D} \mathbf{A} (\sigma_d^2 \mathbf{I} + \mathbf{A}^T \mathbf{D}^T \mathbf{D} \mathbf{A})^{-1}, \quad (\text{S-5})$$

$$= \hat{\mathbf{U}} \hat{\mathbf{\Lambda}} (\sigma_d^2 \mathbf{I} + \hat{\mathbf{\Lambda}}^2)^{-1} \hat{\mathbf{V}}^T. \quad (\text{S-6})$$

---

<sup>1</sup>At this point, we do not know if the singular vectors of  $\mathbf{D} \mathbf{A}$  and  $\mathbf{D}$  are related.

Plugging this in (S-2), we have at the stationary points

$$\hat{\mathbf{U}}\hat{\mathbf{\Lambda}}\hat{\mathbf{V}}^T = \frac{1}{N}\mathbf{D}\mathbf{D}^T\hat{\mathbf{U}}\hat{\mathbf{\Lambda}}\left(\sigma_d^2\mathbf{I} + \hat{\mathbf{\Lambda}}^2\right)^{-1}\hat{\mathbf{V}}^T, \quad (\text{S-7})$$

$$\hat{\mathbf{U}}\left(\sigma_d^2\mathbf{I} + \hat{\mathbf{\Lambda}}^2\right)\hat{\mathbf{\Lambda}} = \frac{1}{N}\mathbf{D}\mathbf{D}^T\hat{\mathbf{U}}\hat{\mathbf{\Lambda}}, \quad (\text{S-8})$$

from which it can be observed that  $\hat{\mathbf{U}}$  contains the eigenvectors of  $\mathbf{D}\mathbf{D}^T$  and hence the left singular vectors of  $\mathbf{D}$ , such that  $\hat{\mathbf{U}} = \mathbf{U}$ . Moreover,  $\sigma_d^2\mathbf{I} + \hat{\mathbf{\Lambda}}^2$  contains the eigenvalues of  $\frac{1}{N}\mathbf{D}\mathbf{D}^T$ . Therefore, similarly to [3], we have the solution

$$\mathbf{D}\mathbf{A} = \mathbf{U}_q\left(\frac{1}{N}\mathbf{\Lambda}_q^2 - \sigma_d^2\mathbf{I}\right)^{1/2}\mathbf{R}, \quad (\text{S-9})$$

where  $\mathbf{R}$  is an arbitrary orthogonal rotation matrix, and  $\mathbf{U}_q$  is a  $M \times q$  matrix consisting of  $q$  left singular vectors of  $\mathbf{D}$  with corresponding singular values that are larger than  $\sqrt{N}\sigma_d$ . Therefore, the singular values of  $\mathbf{D}\mathbf{A}$  satisfy  $l_i = (\frac{\lambda_i^2}{N} - \sigma_d^2)^{1/2}$ .

In the case (ii), we have the same solution (S-9) where the last  $M - q$  smallest singular values of  $\mathbf{D}$  are equal to  $\sqrt{N}\sigma_d$ . This is an unrealistic case and is analyzed also in PPCA [3].

Using the solution (S-9), we can solve for the optimal  $\mathbf{B}$  using (9) as

$$\langle \mathbf{B} \rangle = \Sigma_{\mathbf{B}} \frac{1}{\sigma_d^2} \mathbf{A}^T \mathbf{D}^T \mathbf{D}, \quad (\text{S-10})$$

$$= \left( \sigma_d^2 \mathbf{I} + \mathbf{R}^T \left( \frac{1}{N} \mathbf{\Lambda}_q^2 - \sigma_d^2 \mathbf{I} \right) \mathbf{R} \right)^{-1} \mathbf{R}^T \left( \frac{1}{N} \mathbf{\Lambda}_q^2 - \sigma_d^2 \mathbf{I} \right)^{1/2} \mathbf{U}_q^T \mathbf{U} \mathbf{\Lambda} \mathbf{V}^T, \quad (\text{S-11})$$

$$= \mathbf{R}^T \sigma_d^{-2} \left( \frac{1}{N} \mathbf{\Lambda}_q^2 - \sigma_d^2 \mathbf{I} \right)^{1/2} \left( \mathbf{I} + \sigma_d^{-2} \left( \frac{1}{N} \mathbf{\Lambda}_q^2 - \sigma_d^2 \mathbf{I} \right) \mathbf{R} \mathbf{R}^T \right)^{-1} \mathbf{\Lambda}_q \mathbf{V}_q^T, \quad (\text{S-12})$$

$$= \mathbf{R}^T \left( \frac{1}{N} \mathbf{\Lambda}_q^2 - \sigma_d^2 \mathbf{I} \right)^{1/2} \mathbf{\Lambda}_q^{-1} N \mathbf{V}_q^T. \quad (\text{S-13})$$

Now we have an expression for  $\mathbf{D}\mathbf{A}$  and  $\langle \mathbf{B} \rangle$ . Combining,

$$\mathbf{D}\mathbf{A}\langle \mathbf{B} \rangle = \mathbf{U}_q (\mathbf{\Lambda}_q^2 - N\sigma_d^2 \mathbf{I}) \mathbf{\Lambda}_q^{-1} \mathbf{V}_q^T. \quad (\text{S-14})$$

Plugging  $\mathbf{D} = \mathbf{U}\mathbf{\Lambda}\mathbf{V}^T$  in (S-14) yields the final solution

$$\mathbf{A}\langle \mathbf{B} \rangle = \mathbf{V}_q (\mathbf{\Lambda}_q^2 - N\sigma_d^2 \mathbf{I}) \mathbf{\Lambda}_q^{-2} \mathbf{V}_q^T = \mathbf{V}_q \tilde{\mathbf{\Lambda}}_q \mathbf{V}_q^T, \quad (\text{S-15})$$

with  $\tilde{\mathbf{\Lambda}}_q$  is a diagonal matrix with  $1 - \frac{N\sigma_d^2}{\lambda_j^2}$  on the diagonal. The optimal solution for  $\mathbf{A}$  can easily be extracted from this expression.

Finally, using this expression for  $\mathbf{A}\langle \mathbf{B} \rangle$  in (10), we solve for  $\mathbf{D}$  as

$$\mathbf{Y} = \mathbf{D} \left[ \mathbf{I} + \frac{\sigma_y^2}{\sigma_d^2} \langle (\mathbf{I} - \mathbf{A}\mathbf{B}) (\mathbf{I} - \mathbf{A}\mathbf{B})^T \rangle \right], \quad (\text{S-16})$$

$$= \mathbf{U}\mathbf{\Lambda}\mathbf{V}^T [\mathbf{I} + N\sigma_y^2 \mathbf{V}_q \mathbf{\Lambda}_q^{-2} \mathbf{V}_q^T], \quad (\text{S-17})$$

Using the partitioning  $\mathbf{D} = [\mathbf{U}_q, \mathbf{U}_{N-q}] \text{diag}(\mathbf{\Lambda}_q, \mathbf{\Lambda}_{N-q}) [\mathbf{V}_q, \mathbf{V}_{N-q}]^T$ , we have the final solution

$$\mathbf{Y} = [\mathbf{U}_q, \mathbf{U}_{N-q}] \begin{bmatrix} \mathbf{\Lambda}_q + N\sigma_y^2 \mathbf{\Lambda}_q^{-1} & \mathbf{0} \\ \mathbf{0} & \frac{\sigma_y^2 + \sigma_d^2}{\sigma_d^2} \mathbf{\Lambda}_{N-q} \end{bmatrix} [\mathbf{V}_q, \mathbf{V}_{N-q}]^T. \quad (\text{S-18})$$

Therefore, the eigenvectors of  $\mathbf{D}$  and  $\mathbf{Y}$  are the same, but the eigenvalues are related via

$$\xi_j = \begin{cases} \lambda_j + N\sigma_y^2 \lambda_j^{-1}, & \text{if } \lambda_j > \sqrt{N}\sigma_d \\ \lambda_j \frac{\sigma_y^2 + \sigma_d^2}{\sigma_d^2}, & \text{if } \lambda_j \leq \sqrt{N}\sigma_d \end{cases} \quad (\text{S-19})$$

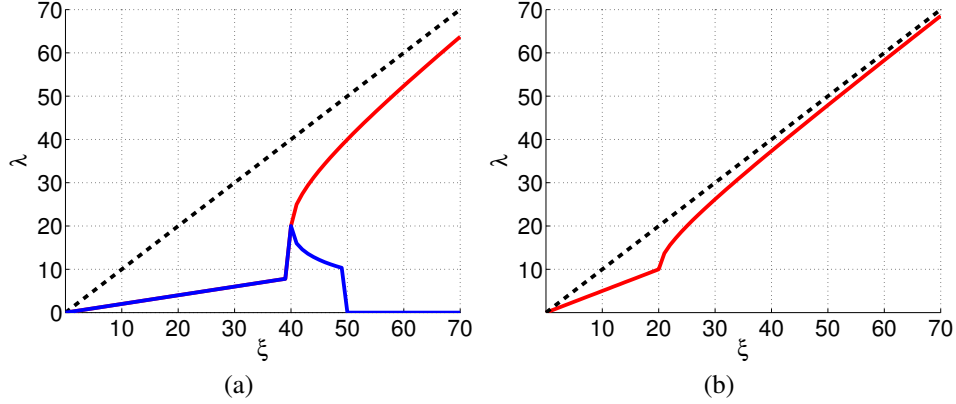

Figure 1: Estimates of singular values  $\lambda$  of  $\mathbf{D}$  given singular values  $\xi$  of  $\mathbf{Y}$  ( $N = 100$ ). The dashed line is  $\lambda = \xi$ . In (a),  $\sigma_d = 1$ ,  $\sigma_y = 2$ , in (b),  $\sigma_d = \sigma_y = 1$ .

The explicit solutions for  $\lambda_j$  are given by

$$\lambda_j = \begin{cases} \xi_j \frac{\sigma_d^2}{\sigma_y^2 + \sigma_d^2}, & \xi_j < 2\sqrt{N}\sigma_y \\ \frac{\xi_j}{2} + \frac{1}{2}\sqrt{\xi_j^2 - 4N\sigma_y^2} & \xi_j \geq 2\sqrt{N}\sigma_y, \xi_j \geq \min\left(2\sqrt{N}\sigma_d, \frac{\sqrt{N}}{\sigma_d}(\sigma_d^2 + \sigma_y^2)\right) \\ \frac{\xi_j}{2} - \frac{1}{2}\sqrt{\xi_j^2 - 4N\sigma_y^2} & \sigma_y \geq \sigma_d, 2\sqrt{N}\sigma_y \leq \xi_j \leq \frac{\sqrt{N}}{\sigma_d}(\sigma_d^2 + \sigma_y^2) \end{cases} \quad (\text{S-20})$$

The solution for  $\lambda_j$  is unique except when  $\sigma_y \geq \sigma_d$  and  $2\sqrt{N}\sigma_y \leq \xi_j \leq \frac{\sqrt{N}}{\sigma_d}(\sigma_d^2 + \sigma_y^2)$ , where we have the latter two cases as solutions. As shown in Fig. 1(a), the last solution is only valid in a comparably small region. To achieve continuity in the solutions, we always choose the first two solutions (S-20).

As can be observed from Fig. 1, the solution (S-20) is a combination of two operations: a down-scaling when  $\xi_j < 2\sqrt{N}\sigma_y$  and a polynomial thresholding operation for larger singular values. The polynomial thresholding preserves the larger singular values as the shrinkage amount gets smaller:  $\xi_j$  gets larger compared to  $2N\sigma_y$ , and for very large values  $\lambda_j \approx \xi_j$ . On the other hand, small singular values get shrunk via down-scaling. Obviously, when  $\sigma_d = 0$ , no shrinkage is applied and  $\mathbf{D} = \mathbf{Y}$ .

## 2 Derivation of the Variational Bayesian Methods

The explicit form of the variational free energy in (17) is given by

$$\begin{aligned} \mathcal{F} &= \langle \log q(\mathbf{D}, \mathbf{A}, \mathbf{B}, \sigma_d^2, \sigma_y^2) - \log p(\mathbf{D}, \mathbf{A}, \mathbf{B}, \sigma_d^2, \sigma_y^2) \rangle_{q(\mathbf{D}, \mathbf{A}, \mathbf{B}, \sigma_d^2, \sigma_y^2)} \\ &= \langle \log q(\mathbf{D}) q(\mathbf{A}) q(\mathbf{B}) q(\sigma_d^2) q(\sigma_y^2) \rangle \\ &+ \frac{MN}{2} \langle \log \sigma_d^2 \rangle + \frac{MN}{2} \langle \log \sigma_y^2 \rangle + \frac{1}{2} \text{tr}(\langle \mathbf{A} \mathbf{C}_\mathbf{A}^{-1} \mathbf{A}^T \rangle) + \frac{1}{2} \text{tr}(\langle \mathbf{C}_\mathbf{B}^{-1} \mathbf{B} \mathbf{B}^T \rangle) + \frac{1}{2} \text{tr}(\langle \mathbf{D} \mathbf{D}^T \rangle) \\ &+ \left( \frac{1}{2\langle \sigma_y^2 \rangle} + \frac{1}{2\langle \sigma_d^2 \rangle} \right) \text{tr}(\langle \mathbf{D} \mathbf{D}^T \rangle) + \frac{1}{2\langle \sigma_y^2 \rangle} \|\mathbf{Y}\|_F^2 - \frac{1}{\langle \sigma_y^2 \rangle} \text{tr}(\langle \mathbf{D} \rangle^T \mathbf{Y}) \\ &- \frac{1}{\langle \sigma_d^2 \rangle} \text{tr}(\langle \mathbf{B}^T \mathbf{A}^T \mathbf{D}^T \mathbf{D} \rangle) + \frac{1}{2\langle \sigma_d^2 \rangle} \text{tr}(\langle \mathbf{A}^T \mathbf{D}^T \mathbf{D} \mathbf{A} \mathbf{B} \mathbf{B}^T \rangle) \\ &+ \frac{N}{2} \log |\mathbf{C}_\mathbf{A}| + \frac{N}{2} \log |\mathbf{C}_\mathbf{B}| + \text{const}. \end{aligned} \quad (\text{S-21})$$

The optimal forms of  $q(\mathbf{D})$  and  $q(\mathbf{B})$  can be found as matrix-variate normal distributions by inspection. The optimal  $q(\mathbf{A})$  does not have a matrix-variate normal form. The optimal distribution is

found in terms of  $\mathbf{a} = \text{vec}(\mathbf{A})$ , by rewriting the terms involving  $\mathbf{A}$  in (S-23) as

$$\begin{aligned}
-\log q(\mathbf{a}) &= \text{tr} \left( \langle \sigma_d^{-2} \rangle \langle \|\mathbf{D} - \mathbf{DAB}\|_F^2 \rangle + \mathbf{AC}_A^{-1} \mathbf{A}^T \right) + \frac{N}{2} \log |\mathbf{C}_A| + \text{const} \\
&= \langle \sigma_d^{-2} \rangle \langle \|\mathbf{d} - (\mathbf{B}^T \otimes \mathbf{D}) \mathbf{a}\|_2^2 \rangle + \mathbf{a}^T (\mathbf{C}_A^{-1} \otimes \mathbf{I}) \mathbf{a} + \frac{N}{2} \log |\mathbf{C}_A| + \text{const} \\
&= \langle \sigma_d^{-2} \rangle \langle (\mathbf{d}^T \mathbf{d} + \mathbf{a}^T (\mathbf{B}^T \otimes \mathbf{D})^T (\mathbf{B}^T \otimes \mathbf{D}) \mathbf{a} - 2\mathbf{a}^T (\mathbf{B}^T \otimes \mathbf{D})^T \mathbf{d}) \rangle + \mathbf{a}^T (\mathbf{C}_A^{-1} \otimes \mathbf{I}) \mathbf{a} + \frac{N}{2} \log |\mathbf{C}_A| + \text{const} \\
&= \mathbf{a}^T \left[ \langle \sigma_d^{-2} \rangle \langle (\mathbf{B}^T \otimes \mathbf{D})^T (\mathbf{B}^T \otimes \mathbf{D}) \rangle + \mathbf{C}_A^{-1} \otimes \mathbf{I} \right] \mathbf{a} - 2\mathbf{a}^T \langle (\mathbf{B}^T \otimes \mathbf{D})^T \mathbf{d} \rangle + \frac{N}{2} \log |\mathbf{C}_A| + \text{const} \\
&= \mathbf{a}^T \left[ \langle \sigma_d^{-2} \rangle (\langle \mathbf{B}^T \mathbf{B} \rangle \otimes \langle \mathbf{D}^T \mathbf{D} \rangle) + \mathbf{C}_A^{-1} \otimes \mathbf{I} \right] \mathbf{a} - 2\mathbf{a}^T \langle (\mathbf{B}^T \otimes \mathbf{D})^T \mathbf{d} \rangle + \frac{N}{2} \log |\mathbf{C}_A| + \text{const} \tag{S-22}
\end{aligned}$$

where we used  $\text{vec}(\mathbf{DAB}) = (\mathbf{B}^T \otimes \mathbf{D}) \text{vec}(\mathbf{A})$ , and  $\mathbf{d} = \text{vec}(\mathbf{D})$ ,  $\mathbf{b} = \text{vec}(\mathbf{B})$ . It can be derived from here that  $q(\mathbf{a})$  has a multivariate normal distribution with mean  $\Sigma_{\mathbf{a}} (\langle \mathbf{B} \rangle^T \otimes \langle \mathbf{D} \rangle)^T \langle \mathbf{d} \rangle$  and covariance  $\Sigma_{\mathbf{a}} = [\langle \sigma_d^{-2} \rangle (\langle \mathbf{B}^T \mathbf{B} \rangle \otimes \langle \mathbf{D}^T \mathbf{D} \rangle) + \mathbf{C}_A^{-1} \otimes \mathbf{I}]^{-1}$ . However, computing  $\mathbf{A}$  in this manner can be very inefficient, as  $\Sigma_{\mathbf{a}}$  might get extremely big ( $MN \times MN$  for  $\mathbf{A}$  of size  $N \times N$  and  $\mathbf{D}$  of size  $M \times N$ ).

Therefore, we force  $q(\mathbf{A})$  to have a matrix-variate form  $\mathcal{N}(\langle \mathbf{A} \rangle, \Sigma_{\mathbf{A}}, \Omega_{\mathbf{A}})$ , which leads to an efficient algorithm. Under this constraint, the variational free energy can be rewritten as (treating all terms not involving  $\mathbf{A}$  as constant)

$$\begin{aligned}
\mathcal{F} &= \frac{1}{2} \text{tr}(\langle \mathbf{AC}_A^{-1} \mathbf{A}^T \rangle) - \frac{1}{\langle \sigma_d^2 \rangle} \text{tr}(\langle \mathbf{B}^T \mathbf{A}^T \mathbf{D}^T \mathbf{D} \rangle) + \frac{1}{2\langle \sigma_d^2 \rangle} \text{tr}(\langle \mathbf{A}^T \mathbf{D}^T \mathbf{DAB} \mathbf{B}^T \rangle) \tag{S-23} \\
&\quad - \frac{N}{2} \log |\Sigma_{\mathbf{A}}| - \frac{N}{2} \log |\Omega_{\mathbf{A}}| + \frac{N}{2} \log |\mathbf{C}_A| + \frac{N}{2} \log |\mathbf{C}_B| + \text{const}.
\end{aligned}$$

Evaluating the expectations using the matrix-variate normal form for  $q(\mathbf{A})$  (see the next section), we minimize  $\mathcal{F}$  with respect to  $\Sigma_{\mathbf{A}}$ , resulting in

$$\Sigma_{\mathbf{A}}^{-1} = \frac{1}{N} \text{tr}(\mathbf{C}_A^{-1} \Omega_{\mathbf{A}}) \mathbf{I} + \frac{1}{N\sigma_d^2} \text{tr}(\Omega_{\mathbf{A}} \langle \mathbf{BB}^T \rangle) \langle \mathbf{D}^T \mathbf{D} \rangle \tag{S-24}$$

Similarly, minimization with respect to  $\Omega_{\mathbf{A}}$  yields

$$\Omega_{\mathbf{A}}^{-1} = \frac{1}{N} \text{tr}(\Sigma_{\mathbf{A}}) \mathbf{C}_A^{-1} + \frac{1}{N\sigma_d^2} \text{tr}(\Sigma_{\mathbf{A}} \langle \mathbf{D}^T \mathbf{D} \rangle) \langle \mathbf{BB}^T \rangle. \tag{S-25}$$

Finally, the update of  $\langle \mathbf{A} \rangle$  is given by

$$\langle \mathbf{A} \rangle \mathbf{C}_A^{-1} + \frac{1}{\sigma_d^2} \langle \mathbf{D}^T \mathbf{D} \rangle \langle \mathbf{A} \rangle \langle \mathbf{BB}^T \rangle = \frac{1}{\sigma_d^2} \langle \mathbf{D}^T \mathbf{D} \rangle \langle \mathbf{B} \rangle^T \tag{S-26}$$

The closed form solution for  $\langle \mathbf{A} \rangle$  cannot be found, but it can be solved using a fixed-point iteration starting from an initial estimate.

## 2.1 Required Statistics for the Variational Bayesian Methods

For a general matrix-variate Gaussian distribution  $p(\mathbf{X}|\mathbf{M}, \Omega, \Sigma) = \mathcal{N}(\mathbf{X}|\mathbf{M}, \Sigma, \Omega)$ , we have [1]

$$\langle \mathbf{X}^T \mathbf{KX} \rangle = \text{tr}(\Sigma \mathbf{K}^T) \Omega + \mathbf{M}^T \mathbf{KM}, \tag{S-27}$$

$$\langle \mathbf{XKX}^T \rangle = \text{tr}(\mathbf{K}^T \Omega) \Sigma + \mathbf{MKM}^T. \tag{S-28}$$

Thus, for  $q(\mathbf{D}) = \mathcal{N}(\langle \mathbf{D} \rangle, \mathbf{I}, \boldsymbol{\Omega}_{\mathbf{D}})$ ,  $q(\mathbf{A}) = \mathcal{N}(\langle \mathbf{A} \rangle, \boldsymbol{\Sigma}_{\mathbf{A}}, \boldsymbol{\Omega}_{\mathbf{A}})$ , and  $q(\mathbf{B}) = \mathcal{N}(\langle \mathbf{B} \rangle, \mathbf{I}, \boldsymbol{\Sigma}_{\mathbf{B}})$ , we have

$$\langle \mathbf{D}^T \mathbf{D} \rangle = \text{tr}(\mathbf{I}_M) \boldsymbol{\Omega}_{\mathbf{D}} + \langle \mathbf{D} \rangle^T \langle \mathbf{D} \rangle \quad (\text{S-29})$$

$$= M \boldsymbol{\Omega}_{\mathbf{D}} + \langle \mathbf{D} \rangle^T \langle \mathbf{D} \rangle \quad (\text{S-30})$$

$$\langle \mathbf{A} \mathbf{A}^T \rangle = \text{tr}(\boldsymbol{\Omega}_{\mathbf{A}}) \boldsymbol{\Sigma}_{\mathbf{A}} + \langle \mathbf{A} \rangle \langle \mathbf{A} \rangle^T \quad (\text{S-31})$$

$$\langle \mathbf{A}^T \mathbf{A} \rangle = \text{tr}(\boldsymbol{\Sigma}_{\mathbf{A}}) \boldsymbol{\Omega}_{\mathbf{A}} + \langle \mathbf{A} \rangle^T \langle \mathbf{A} \rangle \quad (\text{S-32})$$

$$\langle \mathbf{B} \mathbf{B}^T \rangle = \text{tr}(\boldsymbol{\Omega}_{\mathbf{B}}) \boldsymbol{\Sigma}_{\mathbf{B}} + \langle \mathbf{B} \rangle \langle \mathbf{B} \rangle^T \quad (\text{S-33})$$

$$= N \boldsymbol{\Sigma}_{\mathbf{B}} + \langle \mathbf{B} \rangle \langle \mathbf{B} \rangle^T \quad (\text{S-34})$$

$$\langle \mathbf{B}^T \mathbf{B} \rangle = \text{tr}(\boldsymbol{\Sigma}_{\mathbf{B}}) \mathbf{I}_N + \langle \mathbf{B} \rangle^T \langle \mathbf{B} \rangle \quad (\text{S-35})$$

Combining, we obtain

$$\langle \mathbf{A}^T \mathbf{D}^T \mathbf{D} \mathbf{A} \rangle = \text{tr}(\boldsymbol{\Sigma}_{\mathbf{A}} \langle \mathbf{D}^T \mathbf{D} \rangle) \boldsymbol{\Omega}_{\mathbf{A}} + \langle \mathbf{A} \rangle^T \langle \mathbf{D}^T \mathbf{D} \rangle \langle \mathbf{A} \rangle \quad (\text{S-36})$$

$$\langle \mathbf{B}^T \mathbf{A}^T \mathbf{A} \mathbf{B} \rangle = \text{tr}(\boldsymbol{\Sigma}_{\mathbf{B}} \langle \mathbf{A}^T \mathbf{A} \rangle) \mathbf{I}_N + \langle \mathbf{B} \rangle^T \langle \mathbf{A}^T \mathbf{A} \rangle \langle \mathbf{B} \rangle \quad (\text{S-37})$$

$$\langle \mathbf{A} \mathbf{B} \mathbf{B}^T \mathbf{A}^T \rangle = \text{tr}(\langle \mathbf{B} \mathbf{B}^T \rangle \boldsymbol{\Omega}_{\mathbf{A}}) \boldsymbol{\Sigma}_{\mathbf{A}} + \langle \mathbf{A} \rangle \langle \mathbf{B} \mathbf{B}^T \rangle \langle \mathbf{A} \rangle^T \quad (\text{S-38})$$

$$\langle \mathbf{B}^T \mathbf{A}^T \mathbf{D}^T \mathbf{D} \mathbf{A} \mathbf{B} \rangle = \text{tr}(\boldsymbol{\Sigma}_{\mathbf{B}} \langle \mathbf{A}^T \mathbf{D}^T \mathbf{D} \mathbf{A} \rangle) \mathbf{I}_N + \mathbf{B}^T \langle \mathbf{A}^T \mathbf{D}^T \mathbf{D} \mathbf{A} \rangle \mathbf{B} \quad (\text{S-39})$$

## References

- [1] A. K. Gupta and D. K. Nagar. *Matrix Variate Distributions*. Chapman & Hall/CRC, New York, 2000.
- [2] K.V. Mardia, J.T. Kent, and J.M. Bibby. *Multivariate analysis*. Academic Press; New York, 1979.
- [3] M. E. Tipping and C. M. Bishop. Mixtures of probabilistic principal component analyzers. *Neural Comput.*, 11(2):443–482, February 1999.
